# Supplementary material
Source: HighWire-hosted journal article supplement (https://www.cmajopen.ca/highwire/filestream/87687/field_highwire_adjunct_files/2/2021-0223-3-at.pdf)
Supplement: 2021-0223-3-at.pdf [file 2021-0223-3-at.pdf]

# Household Resource Questionnaire

Social factors can have a big impact on children's health and development. During the COVID19 pandemic many families may experience financial stress. The following questions ask about your food, housing and financial situation and parental distress regarding practical problems. You are free not to answer or skip questions.

**Social factors can have a big impact on children's health and development. The following questions ask about access to food, secure housing and other social factors.**

1. In the last 12 months, did you or your household run out of money to pay for the following:

a. Food

- Yes  
 No

b. Housing

- Yes  
 No

c. Utilities

- Yes  
 No

2. Taking everything about COVID-19 into account, what would you say have been the consequences of the novel coronavirus (COVID-19) on you and your household?

- Very negative  
 Negative  
 No effect  
 Positive  
 Very positive

3. How would you describe your household? (choose ONE)

- Mother, father, child(ren)  
 Same sex couple with child(ren)  
 Single parent family (mother head)  
 Single parent family (father head)  
 Grandparent(s) with grandchild(ren)  
 Extended family with child(ren)

4. How many children do you have?

\_\_\_\_\_

## 5. (a) What were the ethnic or cultural origins of your child's ancestors? (Mother's family)

An ancestor is usually more distant than a grandparent. You can provide more than one answer.

- Eastern European (e.g., Polish, Russian, Croatian)
- Western European (e.g., English, French, Portuguese)
- East Asian (e.g., Chinese, Korean, Japanese)
- South Asian (e.g., East Indian, Pakistani, Sri Lankan)
- Southeast Asian (e.g., Vietnamese, Malaysian, Filipino)
- Middle Eastern (e.g., Iranian, Afghan, Palestinian)
- East African (e.g., Ethiopian, Kenyan, Somali)
- Middle African (e.g., Cameroonian, Chadian, Congolese)
- Northern African (e.g., Moroccan, Algerian, Egyptian, Sudanese)
- Southern African (e.g., Botswana, South African)
- Western African (e.g., Ghanaian, Nigerian, Guinean)
- Latin American (e.g., Argentinean, Costa Rican, Mexican)
- Caribbean Region (e.g., Jamaican, Trinidadian/Tobagonian)
- Indian-Caribbean (e.g. Guyana with origins in India)
- Indigenous (Inuit)
- Indigenous (Métis)
- Indigenous (First Nations)
- Oceania (e.g., Samoan, Fijian)
- Australian or New Zealander
- Jewish (Ashkenazi)
- Jewish (Sephardi)
- Unknown
- Other (please specify)

Other

---

## 5. (b) What were the ethnic or cultural origins of your child's ancestors? (Father's family)

- Eastern European (e.g., Polish, Russian, Croatian)
- Western European (e.g., English, French, Portuguese)
- East Asian (e.g., Chinese, Korean, Japanese)
- South Asian (e.g., East Indian, Pakistani, Sri Lankan)
- Southeast Asian (e.g., Vietnamese, Malaysian, Filipino)
- Middle Eastern (e.g., Iranian, Afghan, Palestinian)
- East African (e.g., Ethiopian, Kenyan, Somali)
- Middle African (e.g., Cameroonian, Chadian, Congolese)
- Northern African (e.g., Moroccan, Algerian, Egyptian, Sudanese)
- Southern African (e.g., Botswana, South African)
- Western African (e.g., Ghanaian, Nigerian, Guinean)
- Latin American (e.g., Argentinean, Costa Rican, Mexican)
- Caribbean Region (e.g., Jamaican, Trinidadian/Tobagonian)
- Indian-Caribbean (e.g. Guyana with origins in India)
- Indigenous (Inuit)
- Indigenous (Métis)
- Indigenous (First Nations)
- Oceania (e.g., Samoan, Fijian)
- Australian or New Zealander
- Jewish (Ashkenazi)
- Jewish (Sephardi)
- Unknown
- Other (please specify)

Other\_ethnicity\_father

---

---

6. Are the child's parents currently employed?

(a) Mother/parent 1

- Part time employed
- Full time employed
- On parental leave
- Other
- Not employed

---

Other employment

---

---

(b) Father/parent 2

- Part time employed
- Full time employed
- On parental leave
- Other
- Not employed
- Not applicable / Not known

---

Other employment

---

---

7. Have you or your partner been unemployed as result of the COVID-19 pandemic?

- Yes
- No

---

7a. Are you receiving unemployment insurance?

- Yes
- No

---

8. Have you received government subsidies as result of the COVID-19 pandemic?

- Yes
- No

---

8a. Which government subsidies have you received as a result of the COVID-19 pandemic?

- Canada Emergency Response Benefit (CERB)
- Canada Emergency Wage Subsidy (CEWS)
- Other

---

9. Which of the following best describes the type of dwelling you live in?

- Single house (not attached to any dwelling)
- Semi-detached, duplex house, row house, or townhouse
- Self-contained apartment within a single detached house
- Condominium (pay condo fees)
- Apartment
- Homeless
- Transition (couch surfing, shelter)

---

10. Which of the following best describes your housing situation?

- Owned by you or a member of your household
- Paying rent
- Other (no permanent housing, living with family paying no rent)

---

11. Do you live in subsidized housing?

- Yes
- No

---

12. Do you ever have trouble paying your electricity/ heat/ telephone bill?

- Never true
- Sometimes true
- Often true

---

13. Do you ever have trouble making ends meet at the end of the month?

- Yes
- No

---

14. What was your total family income before taxes last year?

- Less than \$10,000
- \$10,000 to \$19,999
- \$20,000 to \$29,999
- \$30,000 to \$39,999
- \$40,000 to \$49,999
- \$50,000 to \$59,999
- \$60,000 to \$69,999
- \$70,000 to \$79,999
- \$80,000 to \$89,999
- \$90,000 to \$99,999
- \$100,000 to \$149,999
- \$150,000 to \$199,999
- \$200,000 to \$249,999
- \$250,000 to \$299,999
- \$300,000 to \$349,999
- \$350,000 or higher
- Decline or refuse to answer

---

15. In the past 12 months has lack of reliable transportation kept you from medical appointments, meetings, work or from getting things needed for daily living ?

- Yes
- No
- Decline or refuse to answer

---

16. Within the past 12 months did you or other adults in your household go to food banks for food?

- Often true
- Sometimes true
- Never true
- Decline or refuse to answer

**The following questions will ask about household taxes.**

17. Did you or someone in your household file taxes in the past?

- Yes
- No
- Not sure
- Decline or refuse to answer

18. How did you or someone in your household do your taxes?

- By self
- Paid for tax help
- Free tax service
- Not sure
- Decline or refuse to answer

19. Do you receive any tax benefit?

- Yes
- No
- Not sure
- Decline or refuse to answer

Yes, which specific tax benefit(s) did you receive:

- Canada Child Benefit
- Child Disability Benefit
- Canada Workers Benefit
- Ontario trillium benefit
- Ontario energy and property tax credit
- Other tax benefits

**The last couple of questions will inquire about your own health and perceived distress.**

20. In general, would you say your own health is?

- Excellent
- Very good
- Good
- Fair
- Poor

**21. How much distress (defined as a mix of anxiety and depressive feelings) have you experienced in the past week including today?**

**First, select a number (0-10) on the scale to the right of the image that best describes your amount of distress.**

- 
- 10
  - 9
  - 8
  - 7
  - 6
  - 5
  - 4
  - 3
  - 2
  - 1
  - 0

**Second, please indicate if any of the following has been a problem for you in the past week including today. Be sure to check YES or NO for each.**

a. Child Care

- Yes
- No

---

b. Housing

- Yes
- No

---

c. Work/Study

- Yes
- No

---

d. Finances/Insurance

- Yes
- No

---

e. Housekeeping

- Yes
- No

---

f. Transport

- Yes
- No

---

g. Leisure activities/Relaxing

- Yes
- No

---

22. How comfortable are you answering questions about running out of money to pay for food, housing, utilities in a hospital setting?

- Very comfortable
- Somewhat comfortable
- Neutral
- Uncomfortable
- Very uncomfortable

---

23. If you stopped working because of reasons related to COVID-19 and had an income of at least \$5000 in 2019 you might be eligible for Canada Emergency Response Benefits (CERB). Would you like to get help applying for these COVID-19 Benefits?

- Yes
- No

---

23a. We are currently working with tax volunteers to help families applying for COVID benefits. Would you like to be contacted by a tax volunteer? The tax volunteer will connect to you by phone.

- Yes
- No

---

24. Would you like to explore available resources (e.g. access to food, food banks) for your family at the SickKids Resource Navigation Service during your child's hospital stay?

- Yes
- No
- Not sure, I would like to receive more information about this service first.

---

24a. Do you agree with a referral to the SickKids Resource Navigation service? We are only able to make this referral when your child is still admitted in SickKids and not already supported by social work.

- Yes
- No
- Not applicable, my child is already discharged
- Not applicable, my family is already supported by social work

---

25. Do you think a free tax service would be an appropriate and relevant service to provide to families in the hospital?

- Yes
- No
- Not sure

---

Thank you for completing the first survey - ONE more survey to go!
